# Supplementary material for: White emission thin films based on rationally designed supramolecular coordination polymers
Source: Royal Society of Chemistry journal article supplement (doi:10.1039/c7tc01429e), 2017-01-01
Supplement: c7tc01429e1.pdf [file c7tc01429e1.pdf]

# White Emission Thin Films Based on Rationally Designed Supramolecular Coordination Polymers

Jinghui Yang<sup>1</sup>, Yonghai Hui<sup>1\*</sup>, Jianbin Huang<sup>1,2\*</sup>, Yun Yan<sup>2\*</sup>

<sup>1</sup>College of Chemistry and Chemical Engineering, Xinjiang University, Urumqi, 830046, China

<sup>2</sup>Beijing National Laboratory for Molecular Sciences (BNLMS), State Key Laboratory for Structural Chemistry of Unstable and Stable Species, College of Chemistry and Molecular Engineering, Peking University, Beijing 100871, China

**Table S1.** The CIE chromaticity coordinates for Eu<sup>3+</sup>-L<sub>2</sub>EO<sub>4</sub> : Tb<sup>3+</sup>-L<sub>2</sub>EO<sub>4</sub>

| Composition | Concentration ratio | CIE x  | CIE y  |
|-------------|---------------------|--------|--------|
| A           | 50 μM: 200 μM       | 0.2942 | 0.5730 |
| B           | 75 μM: 175 μM       | 0.3178 | 0.5577 |
| C           | 100 μM: 150 μM      | 0.3450 | 0.5406 |
| D           | 125 μM: 125 μM      | 0.3797 | 0.5163 |
| E           | 150 μM: 100 μM      | 0.4182 | 0.4918 |
| F           | 175 μM: 75 μM       | 0.4647 | 0.4625 |
| G           | 200 μM: 50 μM       | 0.5207 | 0.4250 |

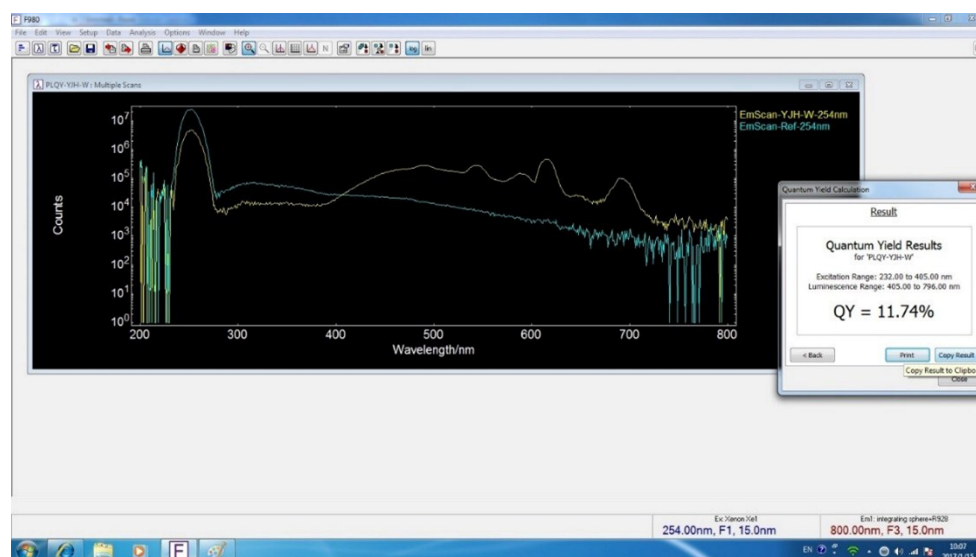

**Figure S1.** The external fluorescence yield of white emission film.

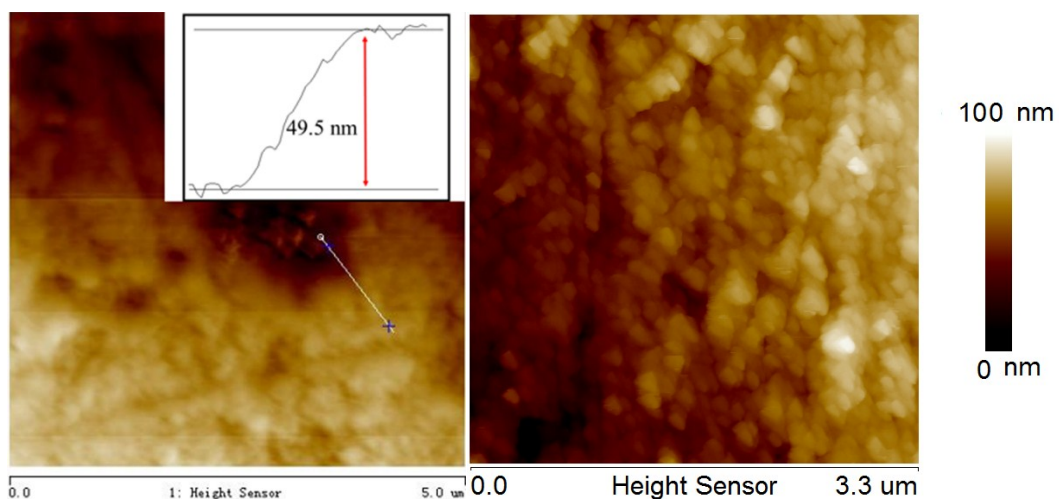

**Figure S2.** The AFM images of the white emission films. The thickness of film is about 49.5 nm (left), whereas the surface roughness is about  $\pm 5$  nm(right).

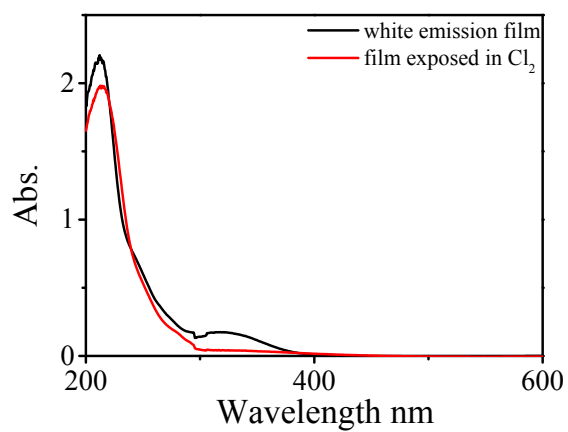

**Figure S3.** The UV-vis spectra of the white emission film and the film treated with  $\text{Cl}_2$ . The absorbance between 300-400 nm featuring the band of conjugated ethylene bond disappears after treating with  $\text{Cl}_2$ .
